# Supplementary material for: Transcriptomic Analysis of Long Noncoding RNA and mRNA Expression Profiles in the Amygdala of Rats with Bone Cancer Pain-Depression Comorbidity
Source: MDPI journal article supplement (doi:10.3390/life11080834), 2021-08-14
Supplement: s1 [file s1]

## Article

# Transcriptomic Analysis of Long Noncoding RNA and mRNA Expression Profiles in the Amygdala of Rats with Bone Cancer Pain–Depression Comorbidity

Shuyan Wu <sup>1,2,†</sup>, Xiaohui Chen <sup>1,2,†</sup>, Fengyi Huang <sup>1,2,†</sup>, Mingxue Lin <sup>1,2</sup>, Pinzhong Chen <sup>1,2</sup>, Haiyang Wan <sup>1,2</sup>, Fei Gao <sup>1,2</sup>, Ting Zheng <sup>1,2</sup> and Xiaochun Zheng <sup>1,2,3,\*</sup>

<sup>1</sup> Department of Anesthesiology, Shengli Clinical Medical College of Fujian Medical University, Fuzhou 350001, China; 2191003810@fjmu.edu.cn (S.W.); chenxh@fjmu.edu.cn (X.C.); huangfy@fjmu.edu.cn (F.H.); ccdjz@fjmu.edu.cn (M.L.); chenpinzhong@fjmu.edu.cn (P.C.); 2191003809@fjmu.edu.cn (H.W.); gaofei@fjmu.edu.cn (F.G.); zhengting@fjmu.com.cn (T.Z.)

<sup>2</sup> Department of Anesthesiology, Fujian Provincial Hospital, Fuzhou 350001, China

<sup>3</sup> Fujian Provincial Institute of Emergency Medicine, Fujian Provincial Key Laboratory of Emergency Medicine, Fuzhou 350001, China

\* Correspondence: zhengxiaochun@fjmu.com.cn

† Authors contributed equally to this work.

**Citation:** Editor, A.; Liu, F.-C.

Transcriptomic Analysis of Long Noncoding RNA and mRNA Expression Profiles in the Amygdala of Rats with Bone Cancer Pain–Depression Comorbidity. *Life* **2021**, *11*, 834. <https://doi.org/10.3390/life11080834>

Academic Editors: Huang-Ping Yu and Fu-Chao Liu

Received: 3 July 2021

Accepted: 11 August 2021

Published: 14 August 2021

**Publisher's Note:** MDPI stays neutral with regard to jurisdictional claims in published maps and institutional affiliations.

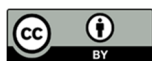

**Copyright:** © 2021 by the authors. Licensee MDPI, Basel, Switzerland. This article is an open access article distributed under the terms and conditions of the Creative Commons Attribution (CC BY) license (<http://creativecommons.org/licenses/by/4.0/>).

## Supplementary Materials:

Table S1. Sequences of Primers in RT-qPCR.

| Gene Name       | Primer Sequences (5'-3')                                             |
|-----------------|----------------------------------------------------------------------|
| RGD1310951      | Forward: CCTCGTCTGGCTCAACAATAC<br>Reverse: AGTCTGTCCCACCTCTCTTG      |
| Timp3           | Forward: GCTGTGCAACTTTGTGGAGAG<br>Reverse: ACCCGAAATTGGAGAGCATGT     |
| Dnaja4          | Forward: GATCTCAGAGCGGCCTAACC<br>Reverse: AGCTCCAGTTCTGATTGCCG       |
| Vamp1           | Forward: GGTCTCCTCCCAATACGAC<br>Reverse: CAGCTCGGTCATCCAACCTCT       |
| NEWGENE_1310561 | Forward: GCCTGAGAAAACGAAAGCAGT<br>Reverse: TCTGTTGGCTGACTTTCTCG      |
| Gabbr2          | Forward: ACTACACAGACCACACGCTG<br>Reverse: TGTATTCGCCGACCTTCACC       |
| MSTRG.12891.1   | Forward: TCCTGAGTGCGAGTTAGTGT<br>Reverse: GCTTTGCTTGGTGTGAGAATG      |
| MSTRG.74.1      | Forward: AGGAGTTGAGTGTGCGGTTA<br>Reverse: AGGAGGAGCCTTGACTTGAG       |
| MSTRG.5653.1    | Forward: CTGTGTGAGTGTTCCCTCCTTCT<br>Reverse: CGTCAAGGGAAGAGCGAGAA    |
| MSTRG.1734.2    | Forward: CCAGTGTAATCTTGCCAGAAGTT<br>Reverse: GGAATGTAGGGATGGGAATGAAG |
| MSTRG.4754.3    | Forward: GACATATCTGCGTGGTTCTGG<br>Reverse: GGCTCCTGACTACAATCTCCTA    |
| MSTRG.5652.5    | Forward: CGCTCCTTACCTGGTTGATC<br>Reverse: CGACCAAAGGAACCATAACTGA     |
| GAPDH           | Forward: ACGGCAAGTTCAACGGCACAG<br>Reverse: GAAGACGCCAGTAGACTCCACGAC  |
